# Supplementary material
Source: MDPI journal article supplement (https://www.mdpi.com/1999-4907/13/12/2102)
Supplement: s1 [file s1]

## Supplementary

# Introducing N<sub>2</sub>-Fixing Tree Species into Eucalyptus Plantation in Sub-tropical China Alleviated Carbon and Nitrogen Constraints within Soil Aggregates

Jinliu Yan <sup>1,†</sup>, Xueman Huang <sup>1,2,†</sup>, Xiaoyan Su <sup>1</sup>, Wen Zhang <sup>1</sup>, Guannv Gao <sup>1</sup> and Yeming You <sup>1,2,\*</sup>

<sup>1</sup> Guangxi Key Laboratory of Forest Ecology and Conservation, Key Laboratory of National Forestry and Grassland Administration on Cultivation of Fast-Growing Timber in Central South China, College of Forestry, Guangxi University, Nanning 530004, China

<sup>2</sup> Guangxi Youyiguan Forest Ecosystem Research Station, Pingxiang 532600, China

\* Correspondence: youyeming@gxu.edu.cn; Tel.: +86-771-3271858

† These authors contributed equally to this work.

**Table S1.** Details of the various soil extracellular enzymes and associated substrates.

| Enzyme Type        | Enzyme                        | International Classification Number | Abbreviation | Substrate                                   |
|--------------------|-------------------------------|-------------------------------------|--------------|---------------------------------------------|
| C-acquiring enzyme | β-1,4-glucosidase             | EC 3.2.1.21                         | BG           | 4-MUB-β-D-glucoside (200 μM)                |
|                    | β-D-cellobiosidase            | EC 3.2.1.91                         | CB           | 4-MUB-β-D-cellobioside (200 μM)             |
| N-acquiring enzyme | β-1,4-N-acetylglucosaminidase | EC 3.2.1.30                         | NAG          | 4-MUB-N-acetyl-β-D-glucosaminide (200 μM)   |
|                    | Leucine aminopeptidase        | EC 3.4.11.1                         | LAP          | L-Leucine-7-amino-4-methylcoumarin (200 μM) |
| P-acquiring enzyme | Acid phosphatase              | EC 3.1.3.2                          | ACP          | 4-MUB-phosphate (200 μM)                    |

EC: Enzyme Commission number describing enzymatic function in increasing level of detail (the first number distinguishes 1-oxidoreductases, 2-transferases, 3-hydrolases, 4-lyases, 5-isomerases, and 6-ligases).
